# Supplementary material for: A medium-chain fatty acid as an alternative energy source in mouse preimplantation development
Source: PubMed Central journal article supplement — Sci Rep. 2012 Dec 5;2:930. doi: 10.1038/srep00930 (PMC3514685; doi:10.1038/srep00930), 2012-12-05
Supplement: srep00930-s1.pdf [file srep00930-s1.pdf]

**Title Page: Supplementary Information**

**Title**

*A medium-chain fatty acid as an alternative energy source in mouse preimplantation development*

**Author names**

Mitsutoshi Yamada<sup>1+</sup>, Kazumi Takanashi<sup>1, 3+</sup>, Toshio Hamatani<sup>1\*</sup>, Akiyoshi Hirayama<sup>3</sup>, Hidenori Akutsu<sup>2</sup>, Tomoko Fukunaga<sup>1</sup>, Seiji Ogawa<sup>1,2</sup>, Kana Sugawara<sup>1,2</sup>, Kosaku Shinoda<sup>3</sup>, Tomoyoshi Soga<sup>3</sup>, Akihiro Umezawa<sup>2</sup>, Naoaki Kuji<sup>1</sup>, Yasunori Yoshimura<sup>1</sup> and Masaru Tomita<sup>3</sup>

**Affiliations**

<sup>1</sup>Department of Obstetrics and Gynecology, Keio University School of Medicine, 35 Shinanomachi Shinjuku-ku, Tokyo 160-8582, Japan

<sup>2</sup>Department of Reproductive Biology, National Research Institute for Child Health and Development, 2-10-1 Ohkura Setagaya-ku, Tokyo 157-8535, Japan

<sup>3</sup>Institute for Advanced Biosciences, Keio University, Tsuruoka, Yamagata, 997-0052, Japan

**Supplementary Table S1 Successful rates of blastocyst development in fatty-acid-containing KSOM, fatty-acid-deficient culture media, energy-depleted culture media or octanoate-supplemented culture media.**

The experiment was repeated more than ten times.

**Fatty-acid-containing KSOM**

|                    | 0.5dpc | 1.5dpc | 2.5dpc | 3.5dpc | 4.5dpc | 5.5dpc |
|--------------------|--------|--------|--------|--------|--------|--------|
| One cell           | 30     | 0      | 0      | 0      | 0      | 0      |
| Two cell           | 0      | 30     | 1      | 0      | 0      | 0      |
| Four cell          | 0      | 0      | 0      | 0      | 0      | 0      |
| Eight cell         | 0      | 0      | 15     | 0      | 0      | 0      |
| Morula             | 0      | 0      | 14     | 30     | 0      | 0      |
| Blastocyst         | 0      | 0      | 0      | 0      | 26     | 10     |
| Hatched blastocyst | 0      | 0      | 0      | 0      | 3      | 19     |
| Fragmentation      | 0      | 0      | 0      | 0      | 1      | 1      |

|                    | 0.5dpc | 1.5dpc | 2.5dpc | 3.5dpc | 4.5dpc | 5.5dpc |
|--------------------|--------|--------|--------|--------|--------|--------|
| One cell           | 14     | 0      | 0      | 0      | 0      | 0      |
| Two cell           | 0      | 14     | 0      | 0      | 0      | 0      |
| Four cell          | 0      | 0      | 11     | 0      | 0      | 0      |
| Eight cell         | 0      | 0      | 3      | 1      | 0      | 0      |
| Morula             | 0      | 0      | 0      | 13     | 0      | 0      |
| Blastocyst         | 0      | 0      | 0      | 0      | 8      | 4      |
| Hatched blastocyst | 0      | 0      | 0      | 0      | 5      | 9      |
| Fragmentation      | 0      | 0      | 0      | 0      | 0      | 0      |

|                    | 0.5dpc | 1.5dpc | 2.5dpc | 3.5dpc | 4.5dpc | 5.5dpc |
|--------------------|--------|--------|--------|--------|--------|--------|
| One cell           | 15     | 0      | 0      | 0      | 0      | 0      |
| Two cell           | 0      | 15     | 1      | 0      | 0      | 0      |
| Four cell          | 0      | 0      | 0      | 0      | 0      | 0      |
| Eight cell         | 0      | 0      | 11     | 0      | 0      | 0      |
| Morula             | 0      | 0      | 3      | 1      | 9      | 0      |
| Blastocyst         | 0      | 0      | 0      | 13     | 5      | 4      |
| Hatched blastocyst | 0      | 0      | 0      | 0      | 0      | 10     |
| Fragmentation      | 0      | 0      | 0      | 1      | 1      | 1      |

|                    | 0.5dpc | 1.5dpc | 2.5dpc | 3.5dpc | 4.5dpc | 5.5dpc |
|--------------------|--------|--------|--------|--------|--------|--------|
| One cell           | 17     | 0      | 0      | 0      | 0      | 0      |
| Two cell           | 0      | 17     | 0      | 0      | 0      | 0      |
| Four cell          | 0      | 0      | 0      | 0      | 0      | 0      |
| Eight cell         | 0      | 0      | 1      | 0      | 0      | 0      |
| Morula             | 0      | 0      | 16     | 1      | 0      | 0      |
| Blastocyst         | 0      | 0      | 0      | 16     | 14     | 4      |
| Hatched blastocyst | 0      | 0      | 0      | 0      | 3      | 13     |
| Fragmentation      | 0      | 0      | 0      | 0      | 0      | 0      |

|                    | 0.5dpc | 1.5dpc | 2.5dpc | 3.5dpc | 4.5dpc | 5.5dpc |
|--------------------|--------|--------|--------|--------|--------|--------|
| One cell           | 39     | 0      | 0      | 0      | 0      | 0      |
| Two cell           | 0      | 39     | 0      | 0      | 0      | 0      |
| Four cell          | 0      | 0      | 1      | 0      | 0      | 0      |
| Eight cell         | 0      | 0      | 14     | 0      | 0      | 0      |
| Morula             | 0      | 0      | 23     | 1      | 0      | 0      |
| Blastocyst         | 0      | 0      | 0      | 37     | 34     | 10     |
| Hatched blastocyst | 0      | 0      | 0      | 0      | 4      | 28     |
| Fragmentation      | 0      | 0      | 1      | 1      | 1      | 1      |

### Fatty-acid-deficient culture media

|                    | 0.5dpc | 1.5dpc | 2.5dpc | 3.5dpc | 4.5dpc | 5.5dpc |
|--------------------|--------|--------|--------|--------|--------|--------|
| One cell           | 26     | 4      | 4      | 2      | 1      | 0      |
| Two cell           | 0      | 22     | 0      | 0      | 0      | 0      |
| Four cell          | 0      | 0      | 6      | 0      | 0      | 0      |
| Eight cell         | 0      | 0      | 12     | 0      | 0      | 0      |
| Morula             | 0      | 0      | 4      | 22     | 3      | 0      |
| Blastocyst         | 0      | 0      | 0      | 0      | 19     | 3      |
| Hatched blastocyst | 0      | 0      | 0      | 0      | 0      | 13     |
| Fragmentation      | 0      | 0      | 0      | 2      | 3      | 10     |

|                    | 0.5dpc | 1.5dpc | 2.5dpc | 3.5dpc | 4.5dpc | 5.5dpc |
|--------------------|--------|--------|--------|--------|--------|--------|
| One cell           | 40     | 8      | 7      | 6      | 1      | 0      |
| Two cell           | 0      | 32     | 0      | 0      | 0      | 0      |
| Four cell          | 0      | 0      | 19     | 0      | 0      | 0      |
| Eight cell         | 0      | 0      | 14     | 0      | 0      | 0      |
| Morula             | 0      | 0      | 0      | 30     | 7      | 2      |
| Blastocyst         | 0      | 0      | 0      | 3      | 22     | 3      |
| Hatched blastocyst | 0      | 0      | 0      | 0      | 0      | 24     |
| Fragmentation      | 0      | 0      | 0      | 1      | 10     | 11     |

|                    | 0.5dpc | 1.5dpc | 2.5dpc | 3.5dpc | 4.5dpc | 5.5dpc |
|--------------------|--------|--------|--------|--------|--------|--------|
| One cell           | 20     | 0      | 0      | 0      | 0      | 0      |
| Two cell           | 0      | 20     | 0      | 0      | 0      | 0      |
| Four cell          | 0      | 0      | 14     | 0      | 0      | 0      |
| Eight cell         | 0      | 0      | 6      | 2      | 2      | 0      |
| Morula             | 0      | 0      | 0      | 17     | 3      | 0      |
| Blastocyst         | 0      | 0      | 0      | 0      | 13     | 10     |
| Hatched blastocyst | 0      | 0      | 0      | 0      | 0      | 5      |
| Fragmentation      | 0      | 0      | 0      | 0      | 2      | 5      |

|                    | 0.5dpc | 1.5dpc | 2.5dpc | 3.5dpc | 4.5dpc | 5.5dpc |
|--------------------|--------|--------|--------|--------|--------|--------|
| One cell           | 30     | 3      | 3      | 0      | 0      | 0      |
| Two cell           | 0      | 27     | 22     | 16     | 11     | 11     |
| Four cell          | 0      | 0      | 5      | 4      | 6      | 3      |
| Eight cell         | 0      | 0      | 0      | 6      | 0      | 0      |
| Morula             | 0      | 0      | 0      | 3      | 5      | 0      |
| Blastocyst         | 0      | 0      | 0      | 0      | 3      | 3      |
| Hatched blastocyst | 0      | 0      | 0      | 0      | 0      | 1      |
| Fragmentation      | 0      | 0      | 0      | 1      | 5      | 12     |

### **50 $\mu$ M-octanoate -supplemented fatty acid deficient culture media**

|                    | 0.5dpc | 1.5dpc | 2.5dpc | 3.5dpc | 4.5dpc | 5.5dpc |
|--------------------|--------|--------|--------|--------|--------|--------|
| One cell           | 40     | 4      | 2      | 2      | 1      | 0      |
| Two cell           | 0      | 36     | 2      | 0      | 0      | 1      |
| Four cell          | 0      | 0      | 17     | 2      | 3      | 1      |
| Eight cell         | 0      | 0      | 13     | 1      | 0      | 0      |
| Morula             | 0      | 0      | 5      | 21     | 12     | 2      |
| Blastocyst         | 0      | 0      | 0      | 13     | 22     | 4      |
| Hatched blastocyst | 0      | 0      | 0      | 0      | 0      | 24     |
| Fragmentation      | 0      | 0      | 1      | 1      | 2      | 6      |

|                    | 0.5dpc | 1.5dpc | 2.5dpc | 3.5dpc | 4.5dpc | 5.5dpc |
|--------------------|--------|--------|--------|--------|--------|--------|
| One cell           | 20     | 0      | 0      | 0      | 0      | 0      |
| Two cell           | 0      | 20     | 5      | 0      | 0      | 0      |
| Four cell          | 0      | 0      | 12     | 3      | 1      | 0      |
| Eight cell         | 0      | 0      | 3      | 0      | 0      | 0      |
| Morula             | 0      | 0      | 0      | 12     | 7      | 0      |
| Blastocyst         | 0      | 0      | 0      | 3      | 12     | 12     |
| Hatched blastocyst | 0      | 0      | 0      | 0      | 0      | 4      |
| Fragmentation      | 0      | 0      | 0      | 2      | 0      | 4      |

**100  $\mu$ M-octanoate -supplemented fatty acid deficient culture media**

|                    | 0.5dpc | 1.5dpc | 2.5dpc | 3.5dpc | 4.5dpc | 5.5dpc |
|--------------------|--------|--------|--------|--------|--------|--------|
| One cell           | 40     | 6      | 6      | 2      | 3      | 0      |
| Two cell           | 0      | 34     | 1      | 0      | 0      | 0      |
| Four cell          | 0      | 0      | 18     | 1      | 0      | 0      |
| Eight cell         | 0      | 0      | 10     | 0      | 0      | 0      |
| Morula             | 0      | 0      | 3      | 22     | 5      | 0      |
| Blastocyst         | 0      | 0      | 0      | 11     | 24     | 3      |
| Hatched blastocyst | 0      | 0      | 0      | 4      | 0      | 24     |
| Fragmentation      | 0      | 0      | 2      | 0      | 8      | 13     |

|                    | 0.5dpc | 1.5dpc | 2.5dpc | 3.5dpc | 4.5dpc | 5.5dpc |
|--------------------|--------|--------|--------|--------|--------|--------|
| One cell           | 24     | 2      | 2      | 2      | 0      | 0      |
| Two cell           | 0      | 17     | 2      | 0      | 0      | 0      |
| Four cell          | 0      | 1      | 13     | 2      | 0      | 0      |
| Eight cell         | 0      | 0      | 3      | 1      | 0      | 0      |
| Morula             | 0      | 0      | 0      | 14     | 3      | 0      |
| Blastocyst         | 0      | 0      | 0      | 1      | 15     | 8      |
| Hatched blastocyst | 0      | 0      | 0      | 0      | 0      | 9      |
| Fragmentation      | 0      | 0      | 0      | 0      | 2      | 7      |

|                    | 0.5dpc | 1.5dpc | 2.5dpc | 3.5dpc | 4.5dpc | 5.5dpc |
|--------------------|--------|--------|--------|--------|--------|--------|
| One cell           | 40     | 6      | 6      | 2      | 3      | 0      |
| Two cell           | 0      | 34     | 1      | 0      | 0      | 0      |
| Four cell          | 0      | 0      | 18     | 1      | 0      | 0      |
| Eight cell         | 0      | 0      | 10     | 0      | 0      | 0      |
| Morula             | 0      | 0      | 3      | 22     | 5      | 0      |
| Blastocyst         | 0      | 0      | 0      | 15     | 24     | 3      |
| Hatched blastocyst | 0      | 0      | 0      | 0      | 0      | 24     |
| Fragmentation      | 0      | 0      | 2      | 0      | 8      | 13     |

|                    | 0.5dpc | 1.5dpc | 2.5dpc | 3.5dpc | 4.5dpc | 5.5dpc |
|--------------------|--------|--------|--------|--------|--------|--------|
| One cell           | 50     | 1      | 2      | 0      | 0      | 0      |
| Two cell           | 0      | 49     | 0      | 0      | 0      | 0      |
| Four cell          | 0      | 0      | 0      | 0      | 0      | 0      |
| Eight cell         | 0      | 0      | 7      | 0      | 0      | 0      |
| Morula             | 0      | 0      | 39     | 33     | 3      | 0      |
| Blastocyst         | 0      | 0      | 0      | 13     | 36     | 20     |
| Hatched blastocyst | 0      | 0      | 0      | 0      | 3      | 22     |
| Fragmentation      | 0      | 0      | 2      | 4      | 8      | 8      |

|                    | 0.5dpc | 1.5dpc | 2.5dpc | 3.5dpc | 4.5dpc | 5.5dpc |
|--------------------|--------|--------|--------|--------|--------|--------|
| One cell           | 50     | 5      | 5      | 5      | 3      | 3      |
| Two cell           | 0      | 45     | 0      | 0      | 0      | 0      |
| Four cell          | 0      | 0      | 0      | 0      | 0      | 0      |
| Eight cell         | 0      | 0      | 4      | 0      | 0      | 0      |
| Morula             | 0      | 0      | 41     | 30     | 4      | 0      |
| Blastocyst         | 0      | 0      | 0      | 15     | 38     | 28     |
| Hatched blastocyst | 0      | 0      | 0      | 0      | 3      | 13     |
| Fragmentation      | 0      | 0      | 0      | 0      | 2      | 6      |

|                    | 0.5dpc | 1.5dpc | 2.5dpc | 3.5dpc | 4.5dpc | 5.5dpc |
|--------------------|--------|--------|--------|--------|--------|--------|
| One cell           | 95     | 7      | 0      | 0      | 0      | 0      |
| Two cell           | 0      | 60     | 0      | 0      | 0      | 0      |
| Four cell          | 0      | 26     | 29     | 0      | 0      | 0      |
| Eight cell         | 0      | 0      | 7      | 0      | 0      | 0      |
| Morula             | 0      | 0      | 50     | 45     | 2      | 0      |
| Blastocyst         | 0      | 0      | 0      | 33     | 76     | 16     |
| Hatched blastocyst | 0      | 0      | 0      | 0      | 0      | 58     |
| Fragmentation      | 0      | 2      | 9      | 17     | 17     | 21     |

|                    | 0.5dpc | 1.5dpc | 2.5dpc | 3.5dpc | 4.5dpc | 5.5dpc |
|--------------------|--------|--------|--------|--------|--------|--------|
| One cell           | 112    | 11     | 11     | 11     | 11     | 5      |
| Two cell           | 0      | 71     | 0      | 0      | 0      | 0      |
| Four cell          | 0      | 29     | 30     | 0      | 0      | 0      |
| Eight cell         | 0      | 0      | 7      | 0      | 0      | 0      |
| Morula             | 0      | 0      | 63     | 51     | 0      | 0      |
| Blastocyst         | 0      | 0      | 0      | 40     | 89     | 8      |
| Hatched blastocyst | 0      | 0      | 0      | 0      | 0      | 80     |
| Fragmentation      | 0      | 1      | 1      | 10     | 12     | 19     |

|                    | 0.5dpc | 1.5dpc | 2.5dpc | 3.5dpc | 4.5dpc | 5.5dpc |
|--------------------|--------|--------|--------|--------|--------|--------|
| One cell           | 105    | 3      | 0      | 0      | 0      | 0      |
| Two cell           | 0      | 97     | 0      | 0      | 0      | 0      |
| Four cell          | 0      | 5      | 39     | 0      | 0      | 0      |
| Eight cell         | 0      | 0      | 6      | 0      | 0      | 0      |
| Morula             | 0      | 0      | 57     | 55     | 0      | 0      |
| Blastocyst         | 0      | 0      | 0      | 40     | 89     | 10     |
| Hatched blastocyst | 0      | 0      | 0      | 0      | 0      | 79     |
| Fragmentation      | 0      | 0      | 3      | 10     | 16     | 22     |

|                    | 0.5dpc | 1.5dpc | 2.5dpc | 3.5dpc | 4.5dpc | 5.5dpc |
|--------------------|--------|--------|--------|--------|--------|--------|
| One cell           | 87     | 11     | 3      | 3      | 3      | 3      |
| Two cell           | 0      | 54     | 0      | 0      | 0      | 0      |
| Four cell          | 0      | 21     | 21     | 0      | 0      | 0      |
| Eight cell         | 0      | 0      | 4      | 0      | 0      | 0      |
| Morula             | 0      | 0      | 50     | 44     | 9      | 0      |
| Blastocyst         | 0      | 0      | 0      | 30     | 63     | 6      |
| Hatched blastocyst | 0      | 0      | 0      | 0      | 0      | 57     |
| Fragmentation      | 0      | 1      | 9      | 10     | 12     | 21     |

|                    | 0.5dpc | 1.5dpc | 2.5dpc | 3.5dpc | 4.5dpc | 5.5dpc |
|--------------------|--------|--------|--------|--------|--------|--------|
| One cell           | 34     | 1      | 0      | 0      | 0      | 0      |
| Two cell           | 0      | 25     | 0      | 0      | 0      | 0      |
| Four cell          | 0      | 7      | 13     | 0      | 0      | 0      |
| Eight cell         | 0      | 0      | 3      | 0      | 0      | 0      |
| Morula             | 0      | 0      | 16     | 18     | 0      | 0      |
| Blastocyst         | 0      | 0      | 0      | 12     | 29     | 6      |
| Hatched blastocyst | 0      | 0      | 0      | 0      | 0      | 20     |
| Fragmentation      | 0      | 1      | 2      | 4      | 5      | 8      |

|                    | 0.5dpc | 1.5dpc | 2.5dpc | 3.5dpc | 4.5dpc | 5.5dpc |
|--------------------|--------|--------|--------|--------|--------|--------|
| One cell           | 41     | 0      | 0      | 0      | 0      | 0      |
| Two cell           | 0      | 14     | 0      | 0      | 0      | 0      |
| Four cell          | 0      | 27     | 16     | 0      | 0      | 0      |
| Eight cell         | 0      | 0      | 5      | 0      | 0      | 0      |
| Morula             | 0      | 0      | 20     | 25     | 0      | 0      |
| Blastocyst         | 0      | 0      | 0      | 12     | 37     | 10     |
| Hatched blastocyst | 0      | 0      | 0      | 0      | 0      | 27     |
| Fragmentation      | 0      | 1      | 1      | 4      | 4      | 4      |

|                    | 0.5dpc | 1.5dpc | 2.5dpc | 3.5dpc | 4.5dpc | 5.5dpc |
|--------------------|--------|--------|--------|--------|--------|--------|
| One cell           | 51     | 2      | 0      | 0      | 0      | 0      |
| Two cell           | 0      | 23     | 0      | 0      | 0      | 0      |
| Four cell          | 0      | 25     | 18     | 0      | 0      | 0      |
| Eight cell         | 0      | 0      | 15     | 1      | 0      | 0      |
| Morula             | 0      | 0      | 15     | 20     | 0      | 0      |
| Blastocyst         | 0      | 0      | 0      | 24     | 44     | 5      |
| Hatched blastocyst | 0      | 0      | 0      | 0      | 0      | 38     |
| Fragmentation      | 0      | 1      | 3      | 6      | 7      | 8      |

**200  $\mu$ M-octanoate -supplemented fatty acid deficient culture media**

|                    | 0.5dpc | 1.5dpc | 2.5dpc | 3.5dpc | 4.5dpc | 5.5dpc |
|--------------------|--------|--------|--------|--------|--------|--------|
| One cell           | 36     | 1      | 1      | 1      | 0      | 0      |
| Two cell           | 0      | 35     | 2      | 1      | 1      | 0      |
| Four cell          | 0      | 0      | 21     | 0      | 1      | 0      |
| Eight cell         | 0      | 0      | 10     | 1      | 0      | 1      |
| Morula             | 0      | 0      | 2      | 31     | 14     | 0      |
| Blastocyst         | 0      | 0      | 0      | 6      | 16     | 1      |
| Hatched blastocyst | 0      | 0      | 0      | 0      | 0      | 16     |
| Fragmentation      | 0      | 0      | 0      | 0      | 8      | 18     |

|                    | 0.5dpc | 1.5dpc | 2.5dpc | 3.5dpc   | 4.5dpc | 5.5dpc |
|--------------------|--------|--------|--------|----------|--------|--------|
| One cell           | 20     | 1      | 0      | 0        | 0      | 0      |
| Two cell           | 0      | 19     | 3      | 0        | 0      | 0      |
| Four cell          | 0      | 0      | 17     | 4 (3C-2) | 0      | 0      |
| Eight cell         | 0      | 0      | 0      | 1        | 0      | 0      |
| Morula             | 0      | 0      | 0      | 15       | 8      | 0      |
| Blastocyst         | 0      | 0      | 0      | 0        | 11     | 8      |
| Hatched blastocyst | 0      | 0      | 0      | 0        | 0      | 8      |
| Fragmentation      | 0      | 0      | 0      | 0        | 1      | 4      |



|                    | 0.5dpc | 1.5dpc | 2.5dpc | 3.5dpc | 4.5dpc | 5.5dpc |
|--------------------|--------|--------|--------|--------|--------|--------|
| One cell           | 20     | 2      | 1      | 1      | 0      | 0      |
| Two cell           | 0      | 17     | 0      | 0      | 0      | 0      |
| Four cell          | 0      | 1      | 3      | 1      | 0      | 0      |
| Eight cell         | 0      | 0      | 3      | 0      | 0      | 0      |
| Morula             | 0      | 0      | 12     | 13     | 1      | 0      |
| Blastocyst         | 0      | 0      | 0      | 4      | 1      | 2      |
| Hatched blastocyst | 0      | 0      | 0      | 0      | 13     | 13     |
| Fragmentation      | 0      | 0      | 1      | 1      | 5      | 5      |

#### 400 $\mu$ M-octanoate -supplemented fatty acid deficient culture media

|                    | 0.5dpc | 1.5dpc | 2.5dpc | 3.5dpc | 4.5dpc | 5.5dpc |
|--------------------|--------|--------|--------|--------|--------|--------|
| One cell           | 40     | 2      | 1      | 0      | 1      | 0      |
| Two cell           | 0      | 38     | 2      | 0      | 0      | 0      |
| Four cell          | 0      | 0      | 28     | 6      | 7      | 0      |
| Eight cell         | 0      | 0      | 5      | 2      | 0      | 0      |
| Morula             | 0      | 0      | 4      | 27     | 14     | 0      |
| Blastocyst         | 0      | 0      | 0      | 3      | 15     | 0      |
| Hatched blastocyst | 0      | 0      | 0      | 0      | 0      | 20     |
| Fragmentation      | 0      | 0      | 0      | 2      | 3      | 20     |

|                    | 0.5dpc | 1.5dpc | 2.5dpc | 3.5dpc   | 4.5dpc | 5.5dpc |
|--------------------|--------|--------|--------|----------|--------|--------|
| One cell           | 29     | 0      | 2      | 1        | 1      | 0      |
| Two cell           | 0      | 29     | 16     | 1        | 1      | 0      |
| Four cell          | 0      | 0      | 11     | 8 (3C-2) | 0      | 0      |
| Eight cell         | 0      | 0      | 0      | 6        | 0      | 0      |
| Morula             | 0      | 0      | 0      | 6        | 24     | 0      |
| Blastocyst         | 0      | 0      | 0      | 14       | 4      | 7      |
| Hatched blastocyst | 0      | 0      | 0      | 0        | 0      | 2      |
| Fragmentation      | 0      | 0      | 0      | 1        | 1      | 20     |

#### 800 $\mu$ M-octanoate -supplemented fatty acid deficient culture media

|                    | 0.5dpc | 1.5dpc | 2.5dpc | 3.5dpc | 4.5dpc | 5.5dpc |
|--------------------|--------|--------|--------|--------|--------|--------|
| One cell           | 40     | 4      | 4      | 4      | 0      | 0      |
| Two cell           | 0      | 36     | 9      | 3      | 5      | 0      |
| Four cell          | 0      | 0      | 26     | 13     | 6      | 0      |
| Eight cell         | 0      | 0      | 0      | 3      | 0      | 0      |
| Morula             | 0      | 0      | 0      | 16     | 9      | 0      |
| Blastocyst         | 0      | 0      | 0      | 0      | 4      | 1      |
| Hatched blastocyst | 0      | 0      | 0      | 0      | 0      | 4      |
| Fragmentation      | 0      | 0      | 1      | 1      | 16     | 35     |

|                    | 0.5dpc | 1.5dpc | 2.5dpc | 3.5dpc | 4.5dpc | 5.5dpc |
|--------------------|--------|--------|--------|--------|--------|--------|
| One cell           | 20     | 0      | 0      | 0      | 0      | 0      |
| Two cell           | 0      | 20     | 0      | 0      | 0      | 0      |
| Four cell          | 0      | 0      | 3      | 0      | 0      | 0      |
| Eight cell         | 0      | 0      | 9      | 0      | 0      | 0      |
| Morula             | 0      | 0      | 8      | 18     | 2      | 0      |
| Blastocyst         | 0      | 0      | 0      | 2      | 15     | 4      |
| Hatched blastocyst | 0      | 0      | 0      | 0      | 0      | 12     |
| Fragmentation      | 0      | 0      | 0      | 0      | 3      | 4      |

### 1000 $\mu$ M-octanoate -supplemented fatty acid deficient culture media

|                    | 0.5dpc | 1.5dpc | 2.5dpc | 3.5dpc    | 4.5dpc | 5.5dpc |
|--------------------|--------|--------|--------|-----------|--------|--------|
| One cell           | 30     | 4      | 4      | 3         | 5      | 0      |
| Two cell           | 0      | 24     | 22     | 8         | 4      | 0      |
| Four cell          | 0      | 0      | 2      | 13 (3C-8) | 10     | 0      |
| Eight cell         | 0      | 0      | 0      | 5         | 0      | 0      |
| Morula             | 0      | 0      | 0      | 1         | 4      | 0      |
| Blastocyst         | 0      | 0      | 0      | 4         | 4      | 4      |
| Hatched blastocyst | 0      | 0      | 0      | 0         | 0      | 0      |
| Fragmentation      | 0      | 2      | 2      | 1         | 3      | 26     |

### 1700 $\mu$ M-octanoate -supplemented fatty acid deficient culture media

|                    | 0.5dpc | 1.5dpc | 2.5dpc | 3.5dpc | 4.5dpc | 5.5dpc |
|--------------------|--------|--------|--------|--------|--------|--------|
| One cell           | 21     | 1      | 1      | 0      | 0      | 0      |
| Two cell           | 0      | 20     | 2      | 1      | 2      | 2      |
| Four cell          | 0      | 0      | 7      | 2      | 2      | 0      |
| Eight cell         | 0      | 0      | 9      | 7      | 0      | 0      |
| Morula             | 0      | 0      | 1      | 9      | 5      | 0      |
| Blastocyst         | 0      | 0      | 0      | 0      | 7      | 1      |
| Hatched blastocyst | 0      | 0      | 0      | 0      | 1      | 8      |
| Fragmentation      | 0      | 0      | 1      | 2      | 4      | 10     |

**3400  $\mu$ M-octanoate -supplemented fatty acid deficient culture media**

|                    | 0.5dpc | 1.5dpc | 2.5dpc | 3.5dpc | 4.5dpc | 5.5dpc |
|--------------------|--------|--------|--------|--------|--------|--------|
| One cell           | 20     | 2      | 0      | 0      | 0      | 0      |
| Two cell           | 0      | 18     | 18     | 18     | 18     | 18     |
| Four cell          | 0      | 0      | 0      | 0      | 0      | 0      |
| Eight cell         | 0      | 0      | 0      | 0      | 0      | 0      |
| Morula             | 0      | 0      | 0      | 0      | 0      | 0      |
| Blastocyst         | 0      | 0      | 0      | 0      | 0      | 0      |
| Hatched blastocyst | 0      | 0      | 0      | 0      | 0      | 0      |
| Fragmentation      | 0      | 0      | 2      | 2      | 2      | 2      |

**5000  $\mu$ M-octanoate -supplemented fatty acid deficient culture media**

|                    | 0.5dpc | 1.5dpc | 2.5dpc | 3.5dpc | 4.5dpc | 5.5dpc |
|--------------------|--------|--------|--------|--------|--------|--------|
| One cell           | 33     | 33     | 3      | 3      | 3      | 3      |
| Two cell           | 0      | 0      | 0      | 0      | 0      | 0      |
| Four cell          | 0      | 0      | 0      | 0      | 0      | 0      |
| Eight cell         | 0      | 0      | 0      | 0      | 0      | 0      |
| Morula             | 0      | 0      | 0      | 0      | 0      | 0      |
| Blastocyst         | 0      | 0      | 0      | 0      | 0      | 0      |
| Hatched blastocyst | 0      | 0      | 0      | 0      | 0      | 0      |
| Fragmentation      | 0      | 0      | 30     | 30     | 30     | 30     |

**Media lacking glucose, pyruvate and fatty acids (energy-depleted media)**

|                    | 0.5dpc | 1.5dpc | 2.5dpc | 3.5dpc | 4.5dpc | 5.5dpc |
|--------------------|--------|--------|--------|--------|--------|--------|
| One cell           | 30     | 4      | 5      | 4      | 4      | 3      |
| Two cell           | 0      | 26     | 20     | 2      | 5      | 4      |
| Four cell          | 0      | 0      | 5      | 18     | 5      | 1      |
| Eight cell         | 0      | 0      | 0      | 1      | 6      | 0      |
| Morula             | 0      | 0      | 0      | 1      | 8      | 1      |
| Blastocyst         | 0      | 0      | 0      | 0      | 1      | 3      |
| Hatched blastocyst | 0      | 0      | 0      | 0      | 0      | 0      |
| Fragmentation      | 0      | 0      | 0      | 1      | 1      | 17     |

|                    | 0.5dpc | 1.5dpc | 2.5dpc | 3.5dpc | 4.5dpc | 5.5dpc |
|--------------------|--------|--------|--------|--------|--------|--------|
| One cell           | 17     | 3      | 2      | 1      | 1      | 0      |
| Two cell           | 0      | 12     | 10     | 5      | 5      | 0      |
| Four cell          | 0      | 0      | 2      | 2      | 0      | 0      |
| Eight cell         | 0      | 0      | 2      | 0      | 0      | 0      |
| Morula             | 0      | 0      | 0      | 4      | 2      | 0      |
| Blastocyst         | 0      | 0      | 0      | 0      | 3      | 5      |
| Hatched blastocyst | 0      | 0      | 0      | 0      | 0      | 0      |
| Fragmentation      | 0      | 2      | 1      | 5      | 6      | 12     |

|                    | 0.5dpc | 1.5dpc | 2.5dpc | 3.5dpc | 4.5dpc | 5.5dpc |
|--------------------|--------|--------|--------|--------|--------|--------|
| One cell           | 16     | 2      | 3      | 3      | 0      | 0      |
| Two cell           | 0      | 14     | 12     | 12     | 0      | 0      |
| Four cell          | 0      | 0      | 1      | 1      | 0      | 0      |
| Eight cell         | 0      | 0      | 0      | 0      | 0      | 0      |
| Morula             | 0      | 0      | 0      | 0      | 1      | 0      |
| Blastocyst         | 0      | 0      | 0      | 0      | 0      | 1      |
| Hatched blastocyst | 0      | 0      | 0      | 0      | 0      | 0      |
| Fragmentation      | 0      | 0      | 0      | 0      | 15     | 15     |

|                    | 0.5dpc | 1.5dpc | 2.5dpc | 3.5dpc   | 4.5dpc | 5.5dpc |
|--------------------|--------|--------|--------|----------|--------|--------|
| One cell           | 20     | 0      | 0      | 1        | 2      | 0      |
| Two cell           | 0      | 20     | 17     | 6        | 7      | 0      |
| Four cell          | 0      | 0      | 3      | 9 (3C-4) | 8      | 0      |
| Eight cell         | 0      | 0      | 0      | 1        | 1      | 0      |
| Morula             | 0      | 0      | 0      | 2        | 0      | 0      |
| Blastocyst         | 0      | 0      | 0      | 0        | 0      | 0      |
| Hatched blastocyst | 0      | 0      | 0      | 0        | 0      | 0      |
| Fragmentation      | 0      | 0      | 0      | 1        | 3      | 20     |

|                    | 0.5dpc | 1.5dpc | 2.5dpc | 3.5dpc | 4.5dpc | 5.5dpc |
|--------------------|--------|--------|--------|--------|--------|--------|
| One cell           | 18     | 0      | 1      | 3      | 0      | 0      |
| Two cell           | 0      | 18     | 12     | 9      | 2      | 0      |
| Four cell          | 0      | 0      | 5      | 3C-1   | 3      | 0      |
| Eight cell         | 0      | 0      | 0      | 5      | 0      | 0      |
| Morula             | 0      | 0      | 0      | 0      | 0      | 0      |
| Blastocyst         | 0      | 0      | 0      | 0      | 0      | 3      |
| Hatched blastocyst | 0      | 0      | 0      | 0      | 0      | 0      |
| Fragmentation      | 0      | 0      | 0      | 0      | 13     | 15     |

|                    | 0.5dpc | 1.5dpc | 2.5dpc | 3.5dpc   | 4.5dpc | 5.5dpc |
|--------------------|--------|--------|--------|----------|--------|--------|
| One cell           | 20     | 12     | 11     | 11       | 11     | 0      |
| Two cell           | 0      | 8      | 8      | 5        | 5      | 0      |
| Four cell          | 0      | 0      | 0      | 3 (3C-1) | 3      | 0      |
| Eight cell         | 0      | 0      | 0      | 0        | 0      | 0      |
| Morula             | 0      | 0      | 0      | 0        | 0      | 0      |
| Blastocyst         | 0      | 0      | 0      | 0        | 0      | 0      |
| Hatched blastocyst | 0      | 0      | 0      | 0        | 0      | 0      |
| Fragmentation      | 0      | 0      | 1      | 1        | 1      | 20     |

### 50 $\mu$ M-octanoate supplemented energy-depleted media

|                    | 0.5dpc | 1.5dpc | 2.5dpc | 3.5dpc | 4.5dpc | 5.5dpc |
|--------------------|--------|--------|--------|--------|--------|--------|
| One cell           | 15     | 5      | 1      | 1      | 0      | 0      |
| Two cell           | 0      | 10     | 0      | 0      | 0      | 0      |
| Four cell          | 0      | 0      | 2      | 0      | 0      | 0      |
| Eight cell         | 0      | 0      | 1      | 0      | 0      | 0      |
| Morula             | 0      | 0      | 11     | 10     | 0      | 0      |
| Blastocyst         | 0      | 0      | 0      | 1      | 5      | 3      |
| Hatched blastocyst | 0      | 0      | 0      | 0      | 1      | 3      |
| Fragmentation      | 0      | 0      | 0      | 3      | 9      | 9      |

|                    | 0.5dpc | 1.5dpc | 2.5dpc | 3.5dpc | 4.5dpc | 5.5dpc |
|--------------------|--------|--------|--------|--------|--------|--------|
| One cell           | 15     | 1      | 1      | 0      | 0      | 0      |
| Two cell           | 0      | 13     | 1      | 0      | 0      | 0      |
| Four cell          | 0      | 0      | 5      | 1      | 0      | 0      |
| Eight cell         | 0      | 0      | 2      | 0      | 0      | 0      |
| Morula             | 0      | 0      | 5      | 11     | 0      | 0      |
| Blastocyst         | 0      | 0      | 0      | 1      | 11     | 1      |
| Hatched blastocyst | 0      | 0      | 0      | 0      | 1      | 11     |
| Fragmentation      | 0      | 1      | 1      | 2      | 3      | 3      |

### 100 $\mu$ M-octanoate supplemented energy-depleted media

|                    | 0.5dpc | 1.5dpc | 2.5dpc | 3.5dpc | 4.5dpc | 5.5dpc |
|--------------------|--------|--------|--------|--------|--------|--------|
| One cell           | 15     | 2      | 1      | 0      | 0      | 0      |
| Two cell           | 0      | 13     | 0      | 1      | 0      | 0      |
| Four cell          | 0      | 0      | 4      | 1      | 0      | 0      |
| Eight cell         | 0      | 0      | 5      | 0      | 0      | 0      |
| Morula             | 0      | 0      | 5      | 8      | 1      | 0      |
| Blastocyst         | 0      | 0      | 0      | 4      | 8      | 1      |
| Hatched blastocyst | 0      | 0      | 0      | 0      | 4      | 12     |
| Fragmentation      | 0      | 0      | 0      | 1      | 2      | 2      |

|                    | 0.5dpc | 1.5dpc | 2.5dpc | 3.5dpc | 4.5dpc | 5.5dpc |
|--------------------|--------|--------|--------|--------|--------|--------|
| One cell           | 15     | 5      | 1      | 0      | 0      | 0      |
| Two cell           | 0      | 3      | 0      | 0      | 0      | 0      |
| Four cell          | 0      | 6      | 0      | 0      | 0      | 0      |
| Eight cell         | 0      | 0      | 0      | 0      | 0      | 0      |
| Morula             | 0      | 0      | 10     | 1      | 0      | 0      |
| Blastocyst         | 0      | 0      | 0      | 8      | 4      | 1      |
| Hatched blastocyst | 0      | 0      | 0      | 0      | 5      | 8      |
| Fragmentation      | 0      | 0      | 5      | 6      | 6      | 6      |

|                    | 0.5dpc | 1.5dpc | 2.5dpc | 3.5dpc | 4.5dpc | 5.5dpc |
|--------------------|--------|--------|--------|--------|--------|--------|
| One cell           | 15     | 0      | 1      | 0      | 0      | 0      |
| Two cell           | 0      | 13     | 1      | 2      | 0      | 0      |
| Four cell          | 0      | 0      | 5      | 0      | 0      | 0      |
| Eight cell         | 0      | 0      | 6      | 1      | 0      | 0      |
| Morula             | 0      | 0      | 0      | 7      | 1      | 0      |
| Blastocyst         | 0      | 0      | 0      | 1      | 7      | 4      |
| Hatched blastocyst | 0      | 0      | 0      | 0      | 1      | 5      |
| Fragmentation      | 0      | 2      | 2      | 4      | 6      | 6      |

### 200 $\mu$ M-octanoate supplemented energy-depleted media

|                    | 0.5dpc | 1.5dpc | 2.5dpc | 3.5dpc | 4.5dpc | 5.5dpc |
|--------------------|--------|--------|--------|--------|--------|--------|
| One cell           | 15     | 0      | 1      | 0      | 0      | 0      |
| Two cell           | 0      | 13     | 1      | 2      | 0      | 0      |
| Four cell          | 0      | 0      | 5      | 0      | 0      | 0      |
| Eight cell         | 0      | 0      | 6      | 1      | 0      | 0      |
| Morula             | 0      | 0      | 0      | 7      | 1      | 0      |
| Blastocyst         | 0      | 0      | 0      | 1      | 7      | 4      |
| Hatched blastocyst | 0      | 0      | 0      | 0      | 1      | 5      |
| Fragmentation      | 0      | 2      | 2      | 4      | 6      | 6      |

|                    | 0.5dpc | 1.5dpc | 2.5dpc | 3.5dpc | 4.5dpc | 5.5dpc |
|--------------------|--------|--------|--------|--------|--------|--------|
| One cell           | 15     | 1      | 1      | 0      | 0      | 0      |
| Two cell           | 0      | 14     | 6      | 0      | 0      | 0      |
| Four cell          | 0      | 0      | 3      | 1      | 0      | 0      |
| Eight cell         | 0      | 0      | 4      | 0      | 0      | 0      |
| Morula             | 0      | 0      | 0      | 11     | 1      | 0      |
| Blastocyst         | 0      | 0      | 0      | 1      | 11     | 4      |
| Hatched blastocyst | 0      | 0      | 0      | 0      | 1      | 2      |
| Fragmentation      | 0      | 0      | 1      | 2      | 2      | 9      |

**Supplementary Table S2 Successful rates of blastocyst development in media with fatty acid-free BSA (FA-free) or in the FA-free media supplemented with various concentrations of octanoate.** When excessive octanoate was added to the FA-free culture media, only 13% of embryos reached the blastocyst stage. Interestingly, a series of studies performed by Nonogaki et al. showed that the addition of high levels of fatty acids to culture media resulted in toxicity with inhibition of the normal development of pronuclear fertilized eggs to blastocysts<sup>44</sup>. Their finding of the detrimental effect of high concentrations of palmitic and stearic acids in culture media on preimplantation embryos echoes our experimental result.

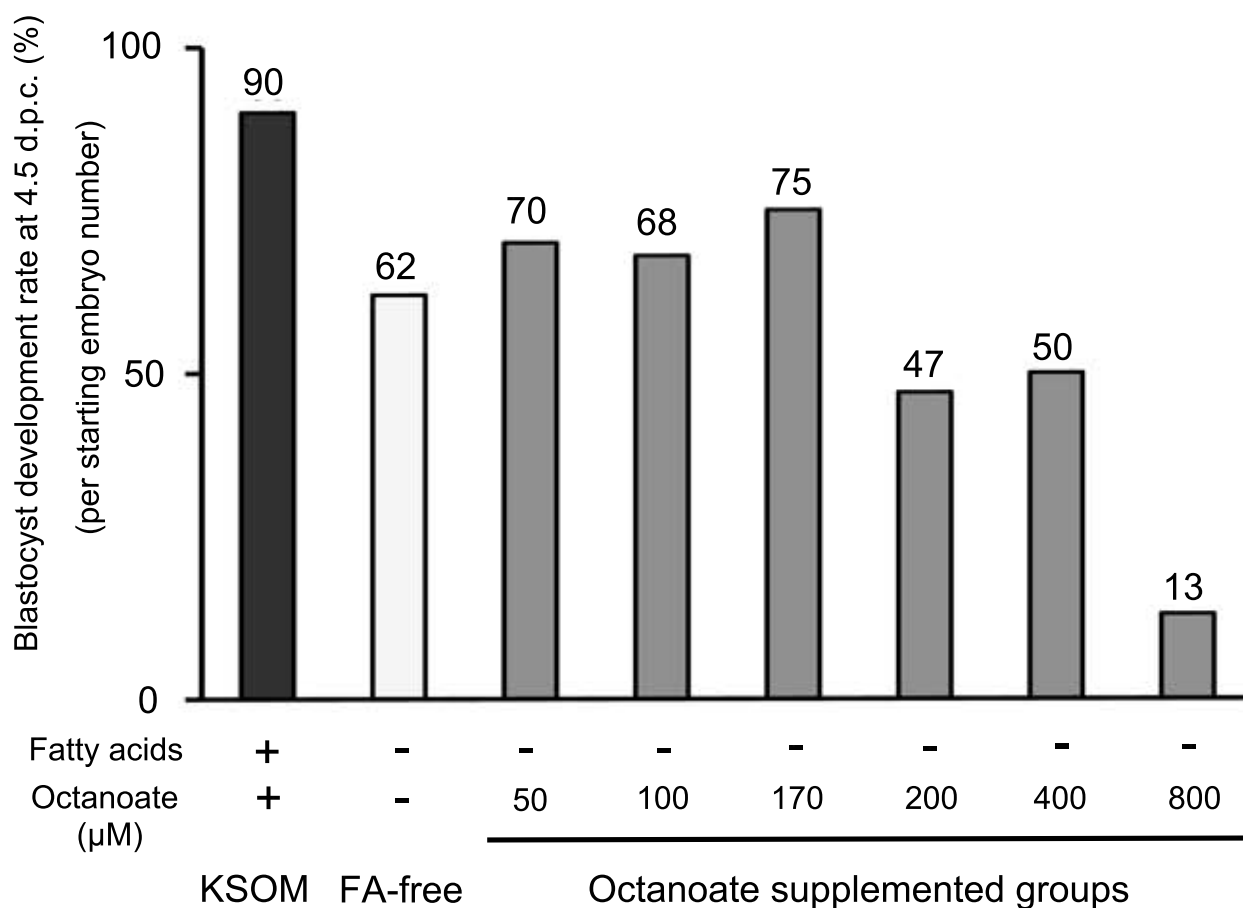

# Supplementary Table S2
